# Supplementary material for: Advanced-Glycation End Products-Selective Probe Development
Source: Preprints.org preprint supplement (doi:10.20944/preprints202402.1624.v1), 2024-02-28
Supplement: Supplementary file 1 [file supplementary]

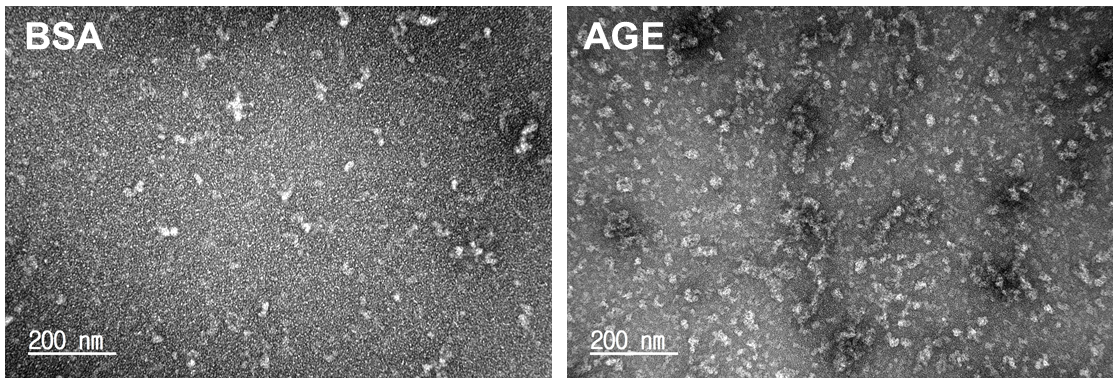


**Figure S1. TEM images support AGE formation compared to only BSA.**

**Figure S1.** TEM images support AGE formation compared to only BSA.


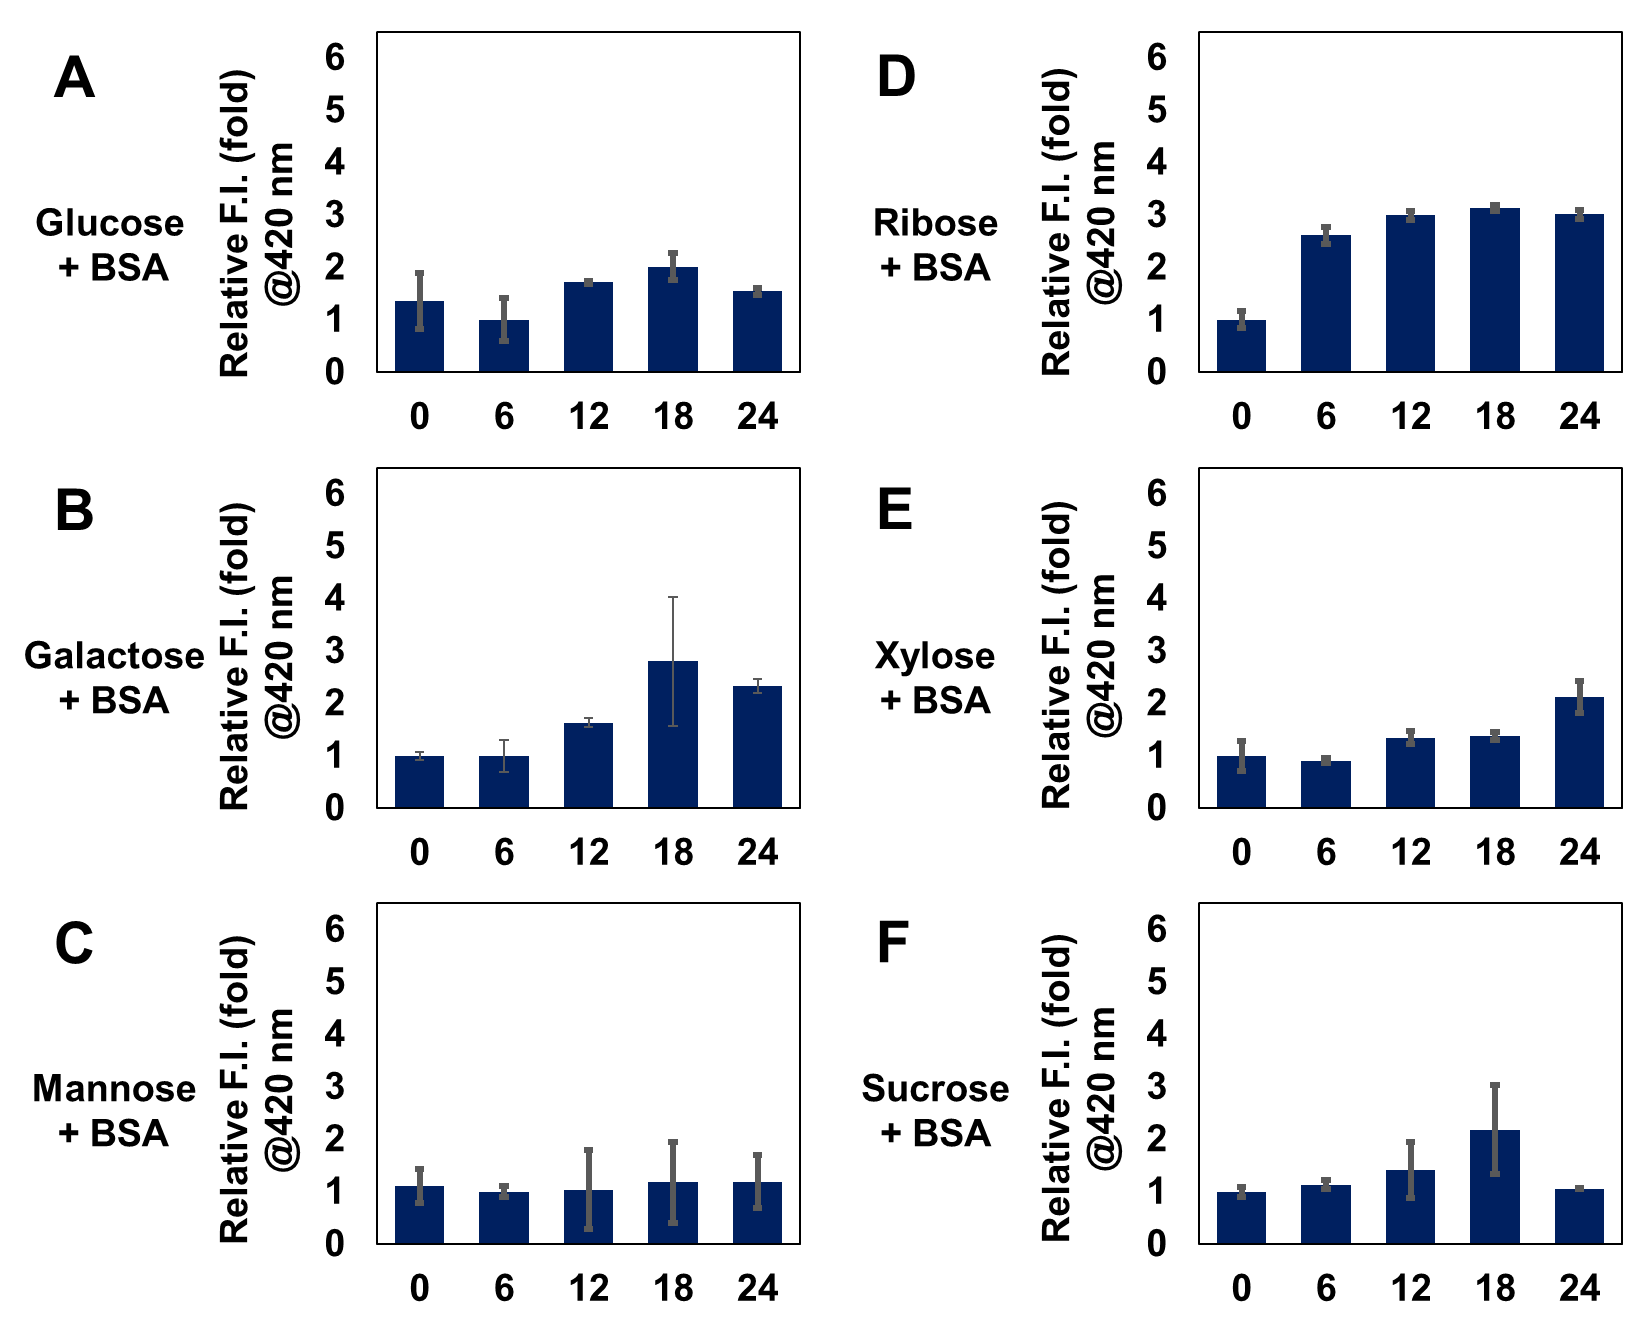


**Figure S2.** Autofluorescence from carbohydrate type-dependent AGEs formation. AGEs were formed by A) Glucose; B) Galactose; C) Mannose; D) Ribose; E) Xylose; and F) Sucrose along with BSA incubation until 24 days at intervals of 6 days. Autofluorescence was measured by the plate reader (ex: 370 nm, em: 420 nm).


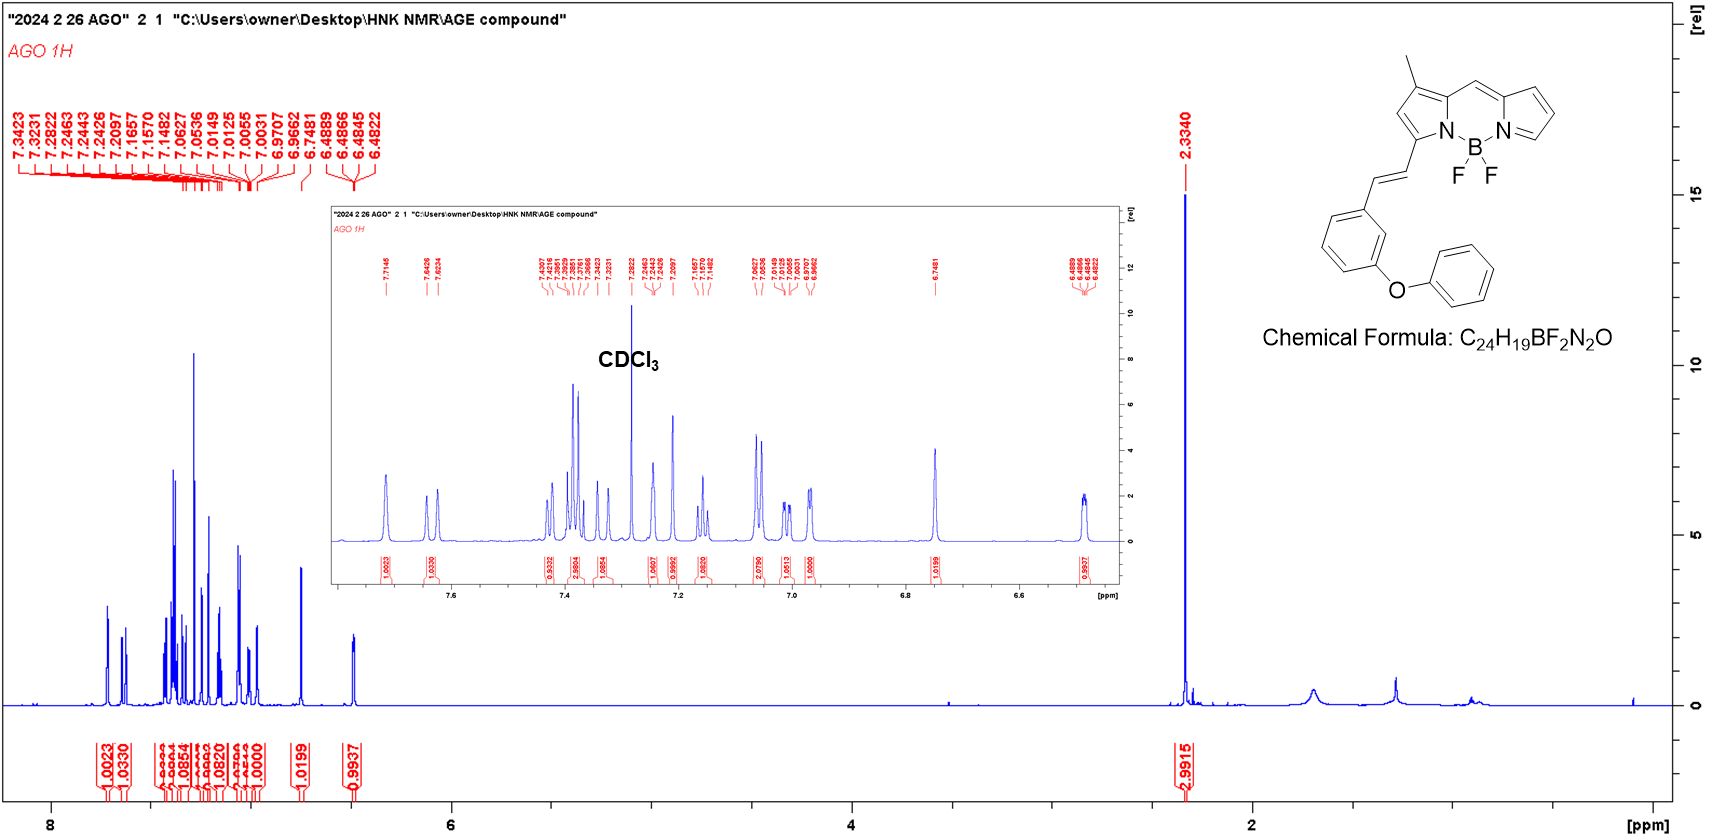


**Figure S3.** 1H NMR spectrum of AGO (850 MHz, CDCl3).


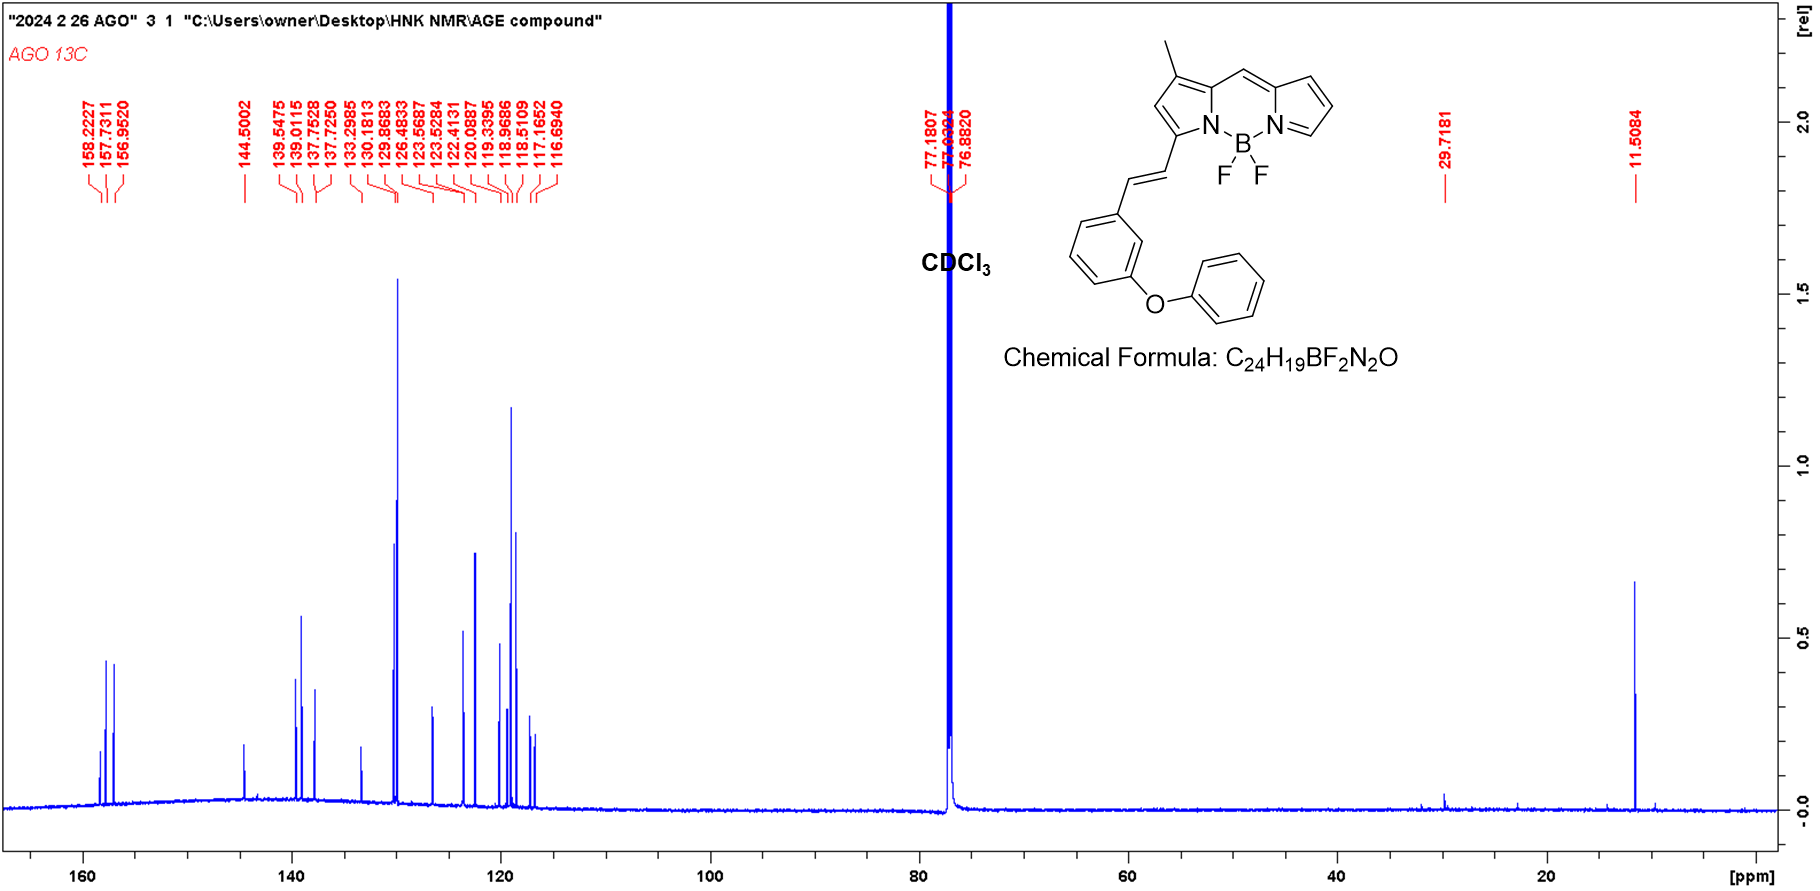


**Figure S4.** 12C NMR spectrum of AGO (214 MHz, CDCl3).


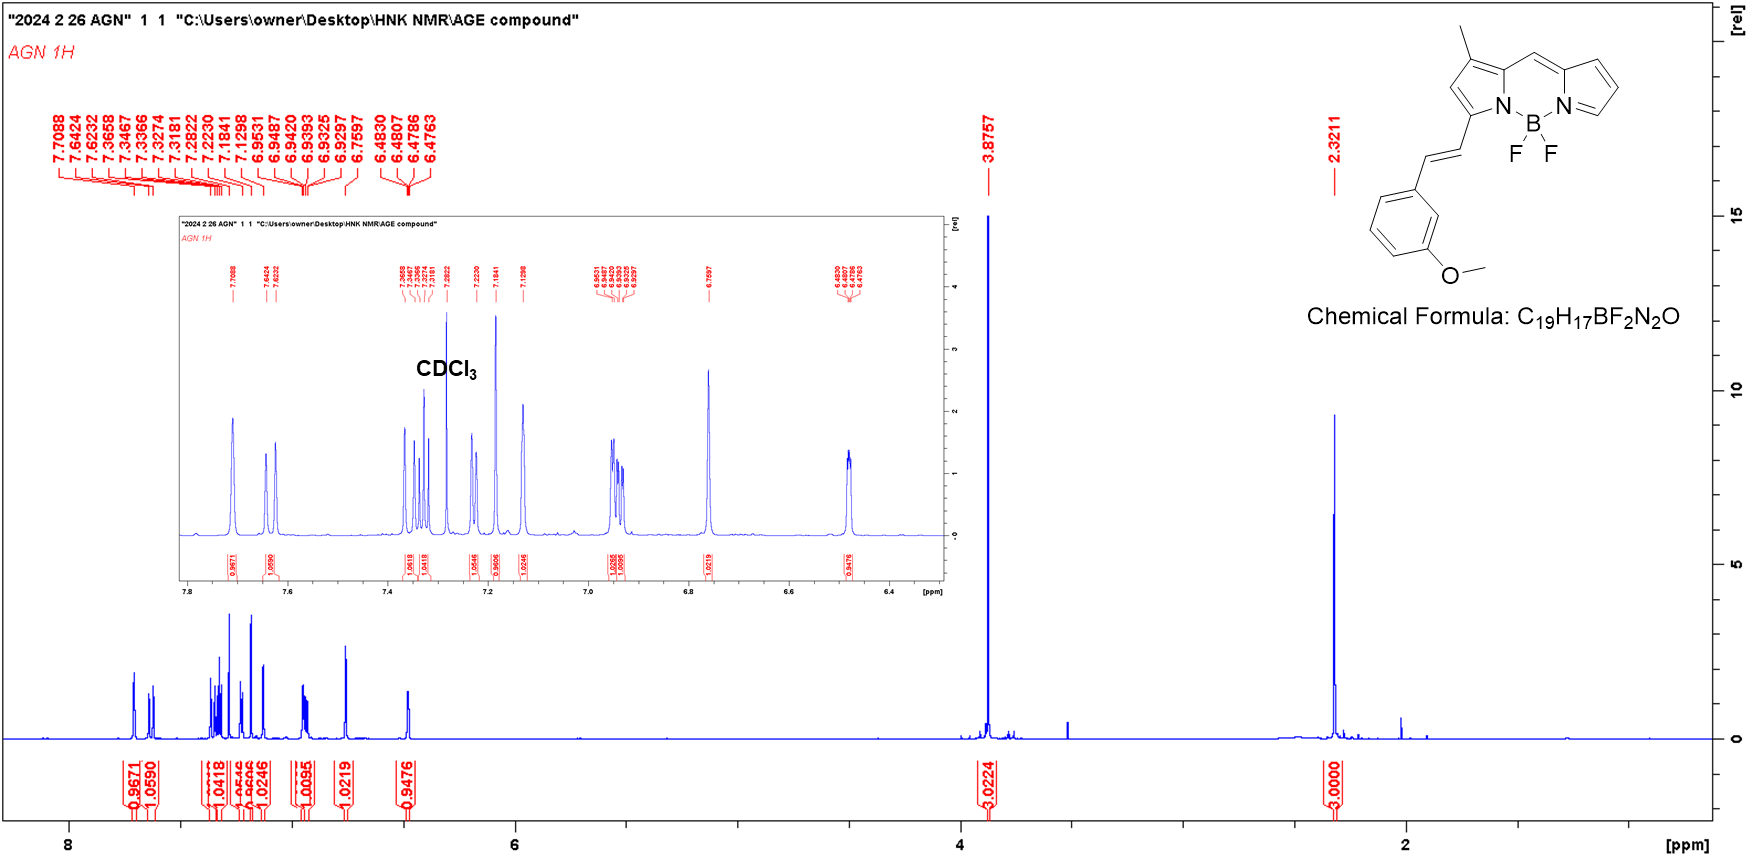


**Figure S5.** 1H NMR spectrum of AGN (850 MHz, CDCl3).


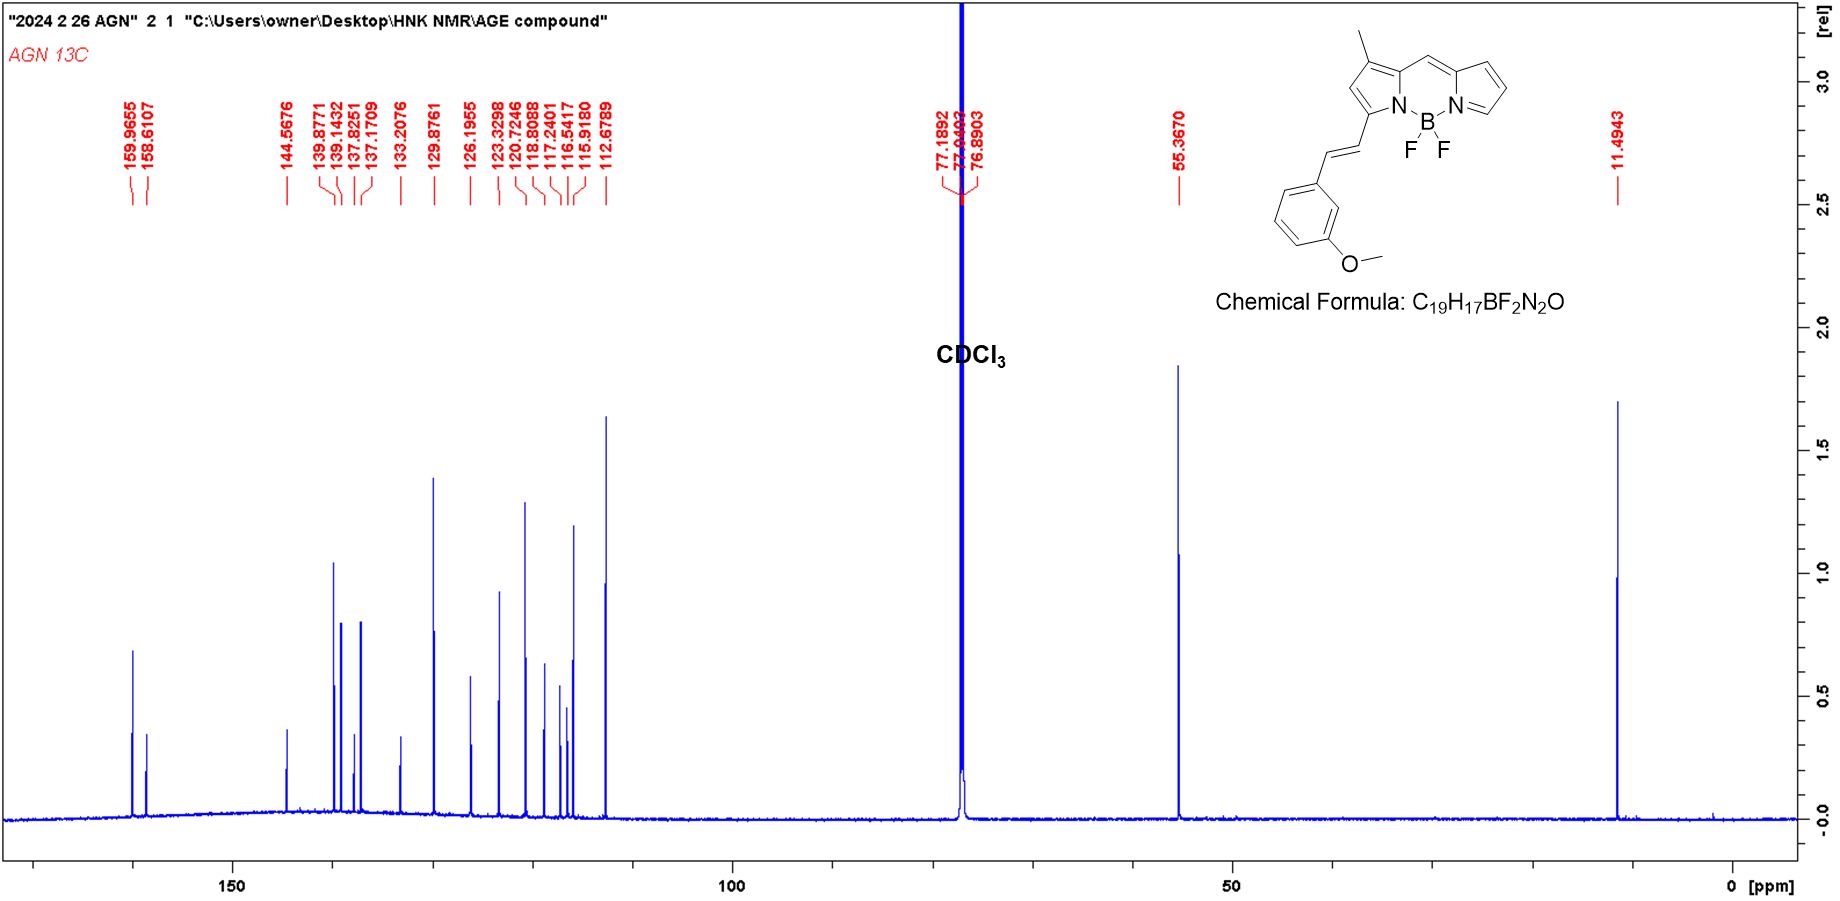


**Figure S6.** 12C NMR spectrum of AGN (214 MHz, CDCl3).


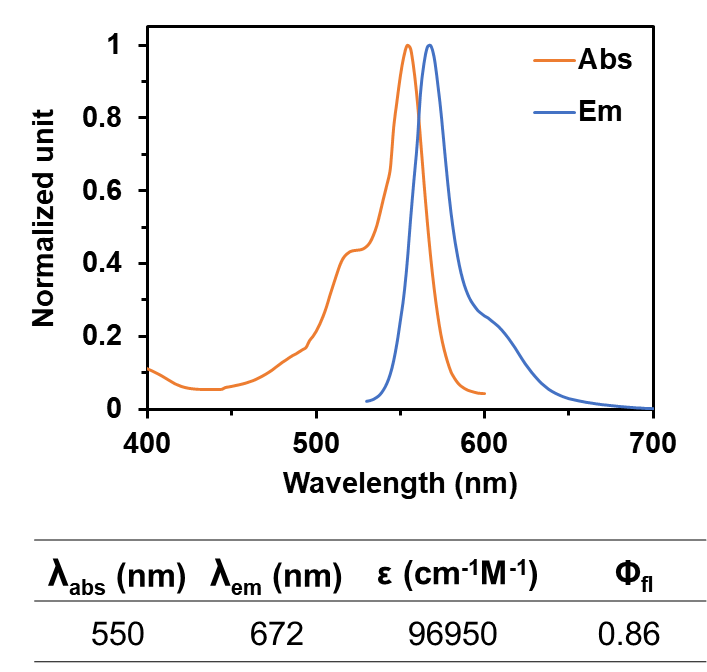


**Figure S7.** Optical properties of AGO.
